# Supplementary material for: Clostridium butyricum and Its Derived Extracellular Vesicles Modulate Gut Homeostasis and Ameliorate Acute Experimental Colitis
Source: PubMed Central journal article supplement (PMC9431305; doi:10.1128/spectrum.01368-22), 2022-06-28
Supplement: spectrum.01368-22-s0001.pdf [file spectrum.01368-22-s0001.pdf]

### Supplementary Figure 1

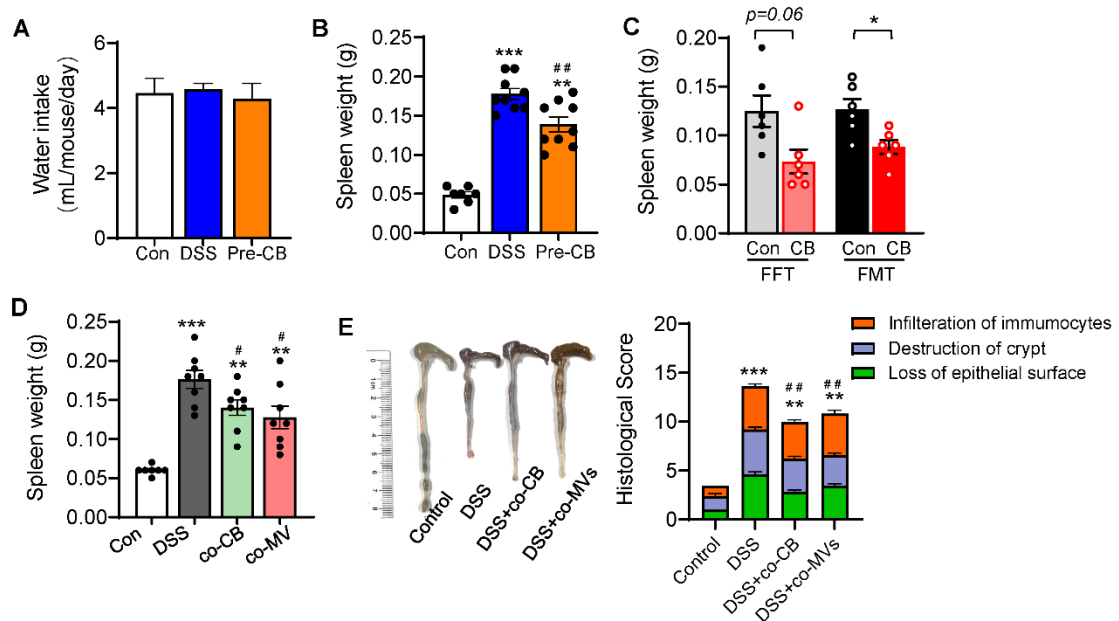

Supplementary Figure 1. (A) Water intake. (B) Spleen weight for *C. butyricum* pre-treatment. (C) Spleen weight for FMT and FFT. (D) Spleen weight for the part 3 experimental. (E) Representative picture for colon length in the part 3 experimental and histological score for part 3 experimental. Data are represented as mean  $\pm$  SEM, (\*  $p \leq 0.05$ , \*\*  $p \leq 0.01$  vs the control group, #  $p \leq 0.05$ , ##  $p \leq 0.01$  vs the DSS group).

Supplementary Figure 2

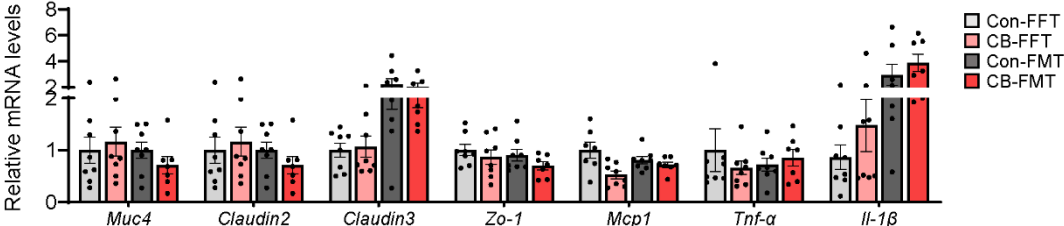

Supplementary Figure 2. Relative mRNA levels genes in the colon tissues of FFT and FMT experimental.

### Supplementary Figure 3

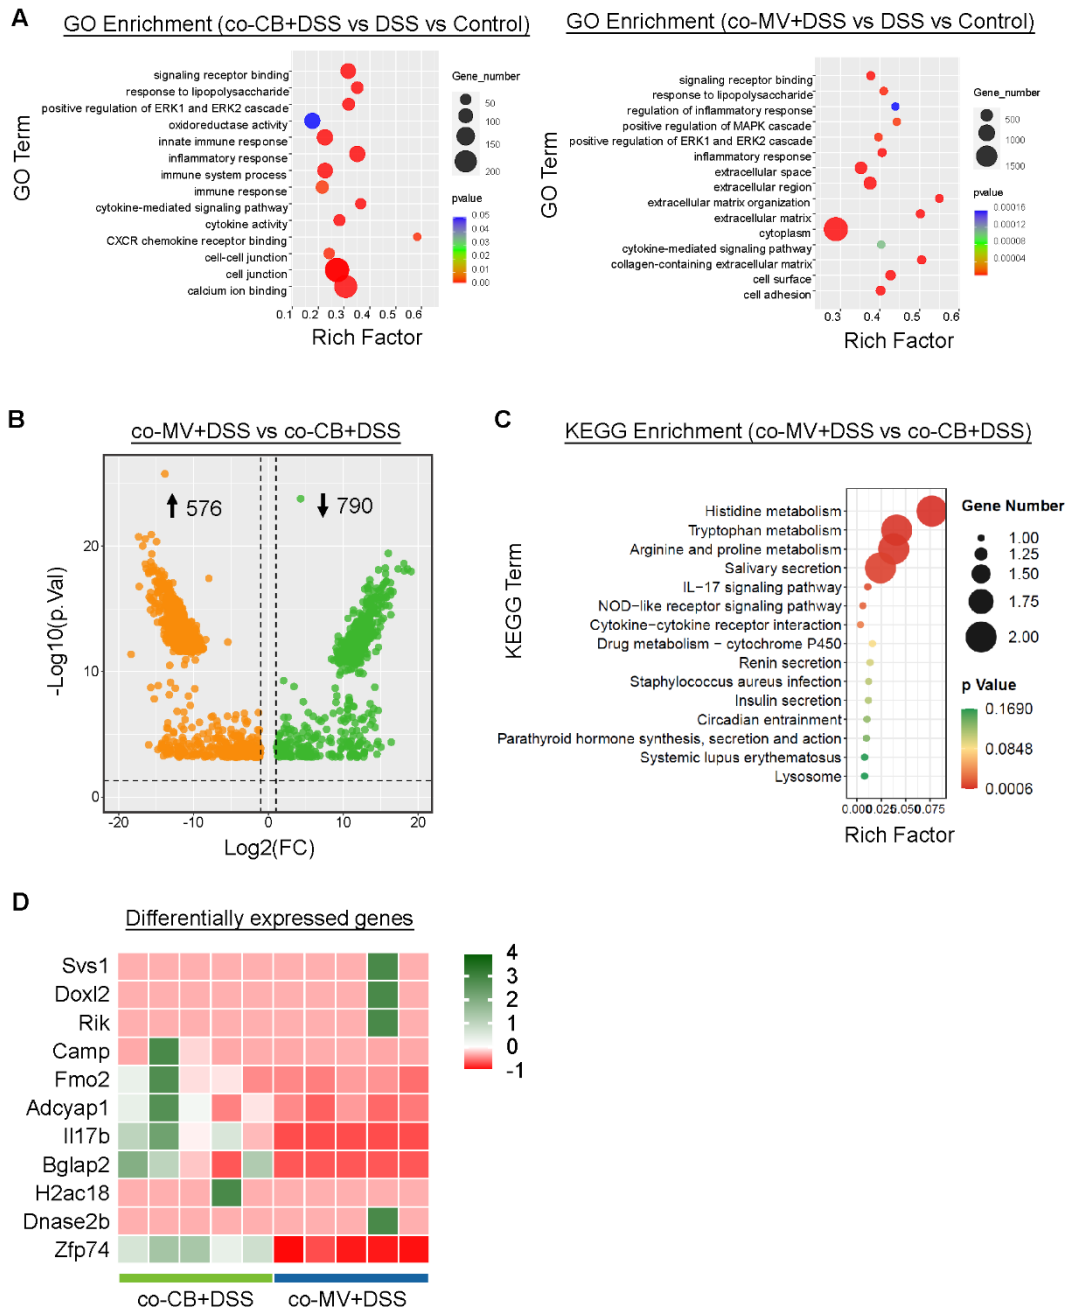

Supplementary Figure 3. (A) GO enrichment of pathway in co-CB+DSS vs DSS vs Control group, co-MV+DSS vs DSS vs Control group. (B) Volcano plot of differentially expressed transcripts with co-MV+DSS vs co-CB+DSS group. (C) KEGG enrichment of pathway in co-MV+DSS vs co-CB+DSS group. (D) Heatmap summary of the differentially expressed genes.

## Supplementary Figure 4

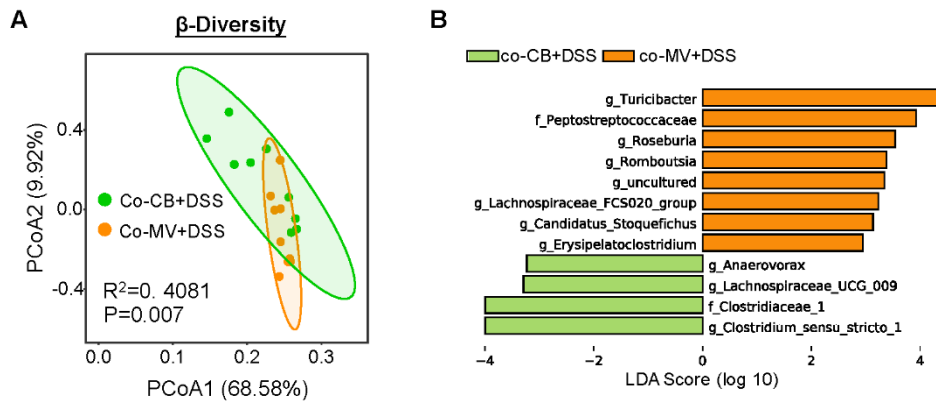

Supplementary Figure 4. (A) PCoA of gut microbiota in each group. (B) Analysis of differences in the microbial taxa shown by LEfSe.

Supplementary Table S1. Mice primer sequences in RT- PCR assays.

| <b>Genes</b> | <b>Forward</b>             | <b>Reverse</b>              |
|--------------|----------------------------|-----------------------------|
| mβ-Actin     | AGGCCAGAGCAAGAGAGGTA       | GGGGTGTGAAGGTCTCAAACA       |
| mF4/80       | GCTGTGAGATTGTGGAAGCA       | CTGTACCCACATGGCTGATG        |
| mCd11c       | AAAATCTCCAACCCATGCTG       | CACCACCAGGGTCTTCAAGT        |
| mTnf-a       | CCCACACCGTCAGCCGATTT       | GTCTAAGTACTTGGGCAGATTGACC   |
| mIL-6        | CCACTTCACAAGTCGGAGGCTTA    | GCAAGTGCATCATCGTTGTTTCATAC  |
| mIL-1β       | GGGCTCAAAGGAAAGAATC        | TACCAGTTGGGGAACCTCTGC       |
| mMcp1        | AGGTCCCTGTCATGCTTCTGG      | CTGCTGCTGGTGATCCTCTTG       |
| mCcl5        | TGCCCTCACCATCATCCTCACT     | GGCGGTTCCCTTCGAGTGACA       |
| mClaudin 1   | GTTTGCAGAGACCCCATCAC       | AGAAGCCAGGATGAAACCCA        |
| mClaudin 2   | GTC ATC GCC CAT CAG AAG AT | ACT GTT GGA CAG GGA ACC AG  |
| mClaudin 3   | GCT CTC AGA GTC CGT TGA CC | CTG CCC TTT CAG GTT AGC AG  |
| mJAM-A       | CACCTTCTCATCCAGTGGCATC     | CTCCACAGCATCCATGT-GTGC      |
| mZo-1        | AAGAATATGGTCTTCGATTGGC     | ATTTTCTGTACAGTACCATTTATCTTC |
| mMuc1        | AGTTACGGTCAGGCTGCTCCGTGGT  | ACCCTCCCGGAAAACCACAGTC      |
| mMuc2        | TGCTGCTGACGAGTGGTTGGTG     | CGGACGCTTGGTGGTGAGGC        |
| mMuc4        | GGCCCGCTTGGACATTTGGTGA     | AGTCTCCAGCCCGTTGAAGGT       |
